# Supplementary material for: The Pitfall of White Blood Cell Cystine Measurement to Diagnose Juvenile Cystinosis
Source: MDPI journal article supplement (doi:10.3390/ijms24021253), 2023-01-09
Supplement: s1 [file s1]

**Clinical laboratory values (blood and fibroblasts)**

|                      | <b>nmol 1/2 cystine/mg protein</b> |
|----------------------|------------------------------------|
| c.530 A>G WBC        | 1.31                               |
| c.530A>G fibroblasts | 3.4                                |

**c.530 A>G ciPTEC and ciPODO measurements**

|                 | <b>Solution</b> | <b>Total Volume NEM+SSA (μl)</b> | <b>Protein μg/mL</b> | <b>Cys μM</b> | <b>Cys nmol</b> | <b>Cys nmol/mg protein</b> | <b>1/2 cystine nmol/mg protein</b> | <b>average</b> | <b>stdev</b> |
|-----------------|-----------------|----------------------------------|----------------------|---------------|-----------------|----------------------------|------------------------------------|----------------|--------------|
| c.530 A>G PTECs | 5mM NEM+12%SSA  | 100+50                           | 563.8                | 4.02          | 4018.304<br>448 | 7.13                       | 14.25                              | 13.39          | 0.69         |
| c.530 A>G PTECs | 5mM NEM+12%SSA  | 100+50                           | 806.1                | 5.04          | 5035.517<br>598 | 6.25                       | 12.49                              |                |              |
| c.530 A>G PTECs | 5mM NEM+12%SSA  | 100+50                           | 752.4                | 5.13          | 5129.770<br>467 | 6.82                       | 13.64                              |                |              |
| c.530 A>G PTECs | 5mM NEM+12%SSA  | 100+50                           | 776.4                | 4.90          | 4903.241<br>845 | 6.32                       | 12.63                              |                |              |
| c.530 A>G PTECs | 5mM NEM+12%SSA  | 100+50                           | 811.1                | 5.49          | 5486.540<br>248 | 6.76                       | 13.53                              |                |              |
| c.530 A>G PTECs | 5mM NEM+12%SSA  | 100+50                           | 728.9                | 5.04          | 5035.963<br>029 | 6.91                       | 13.82                              |                |              |
| c.530 A>G PODOs | 5mM NEM+12%SSA  | 100+50                           | 706.3                | 2.73          | 2733.833<br>538 | 3.87                       | 7.74                               | 8.59           | 0.62         |
| c.530 A>G PODOs | 5mM NEM+12%SSA  | 100+50                           | 625.8                | 2.72          | 2719.969<br>076 | 4.35                       | 8.69                               |                |              |
| c.530 A>G PODOs | 5mM NEM+12%SSA  | 100+50                           | 659.9                | 3.10          | 3099.073<br>063 | 4.70                       | 9.39                               |                |              |
| c.530 A>G PODOs | 5mM NEM+12%SSA  | 100+50                           | 766.6                | 3.46          | 3462.062<br>907 | 4.52                       | 9.03                               |                |              |
| c.530 A>G PODOs | 5mM NEM+12%SSA  | 100+50                           | 756.2                | 3.03          | 3026.392<br>672 | 4.00                       | 8.00                               |                |              |
| c.530 A>G PODOs | 5mM NEM+12%SSA  | 100+50                           | 707.3                | 3.07          | 3072.633<br>352 | 4.34                       | 8.69                               |                |              |

Control values

|               | Solution       | Total Volume<br>NEM+SSA (μl) | Protein μg/mL | Cys<br>μM | Cys nmol        | Cys nmol/mg<br>protein | 1/2 cystine<br>nmol/mg protein | average | stdev |
|---------------|----------------|------------------------------|---------------|-----------|-----------------|------------------------|--------------------------------|---------|-------|
| Control PTECs | 5mM NEM+12%SSA | 100+50                       | 797.1         | 1.15      | 1152.108<br>162 | 1.45                   | 2.89                           | 2.04    | 0.68  |
| Control PTECs | 5mM NEM+12%SSA | 100+50                       | 751.8         | 0.73      | 725.3667<br>974 | 0.96                   | 1.93                           |         |       |
| Control PTECs | 5mM NEM+12%SSA | 100+50                       | 778.1         | 0.81      | 812.0816<br>146 | 1.04                   | 2.09                           |         |       |
| Control PTECs | 5mM NEM+12%SSA | 100+50                       | 797.1         | 0.49      | 494.4965<br>49  | 0.62                   | 1.24                           |         |       |
| Control PODOs | 5mM NEM+12%SSA | 200+100                      | 297.6         | 0.63      | 626.5411<br>046 | 2.11                   | 4.21                           | 5.01    | 1.65  |
| Control PODOs | 5mM NEM+12%SSA | 200+100                      | 212.2         | 0.73      | 732.9975<br>204 | 3.45                   | 6.91                           |         |       |
| Control PODOs | 5mM NEM+12%SSA | 200+100                      | 319.5         | 0.62      | 623.6802<br>777 | 1.95                   | 3.90                           |         |       |
